# Supplementary material for: Hypoxia combined with spheroid culture improves cartilage specific function in chondrocytes
Source: Royal Society of Chemistry journal article supplement (doi:10.1039/c4ib00273c), 2015-01-01
Supplement: c4ib00273c1.pdf [file c4ib00273c1.pdf]

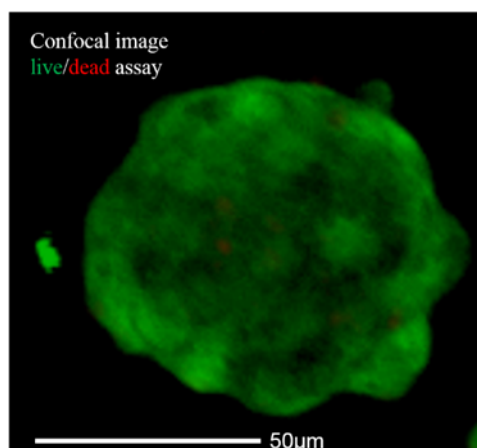

**Supplemental figure 1.** The viability test of chondrocytes cultured for up to 7 days using dead/live staining. Green color represented for live cells stained by Calcein AM and Red for dead cells stained by Eth-D.

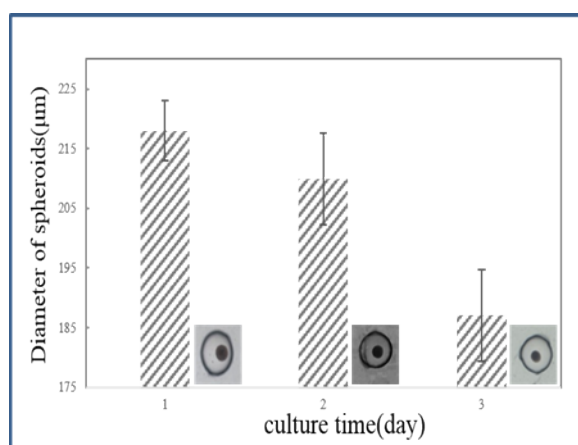

**Supplemental figure 2.** The proliferation testing of chondrocytes cultured in concave microwells for 3 days. Error bars represent the standard deviations (mean  $\pm$  SD) obtained from six independent experiments.

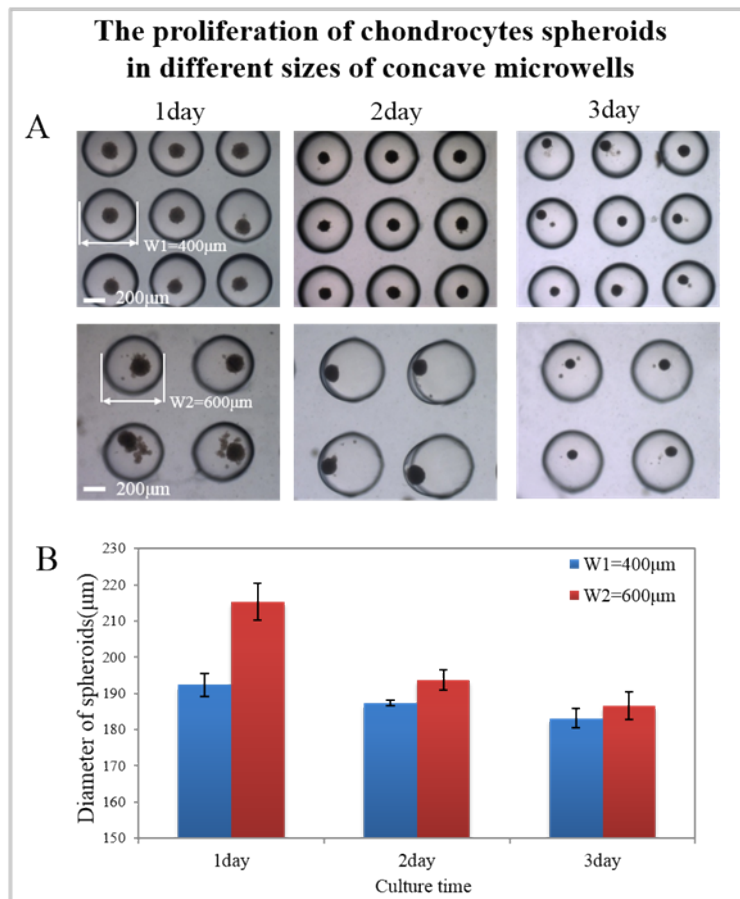

**Supplemental figure 3.** The proliferation testing of chondrocytes cultured in concave microwells with different sizes over 3 days. A. Bright images of cellular spheroids cultured in microwells with diameter at 400µm, and 600µm, respectively. B. The averaged diameter of chondrocytes spheroids cultured in both sizes of microwells (mean  $\pm$ SD, n=10).

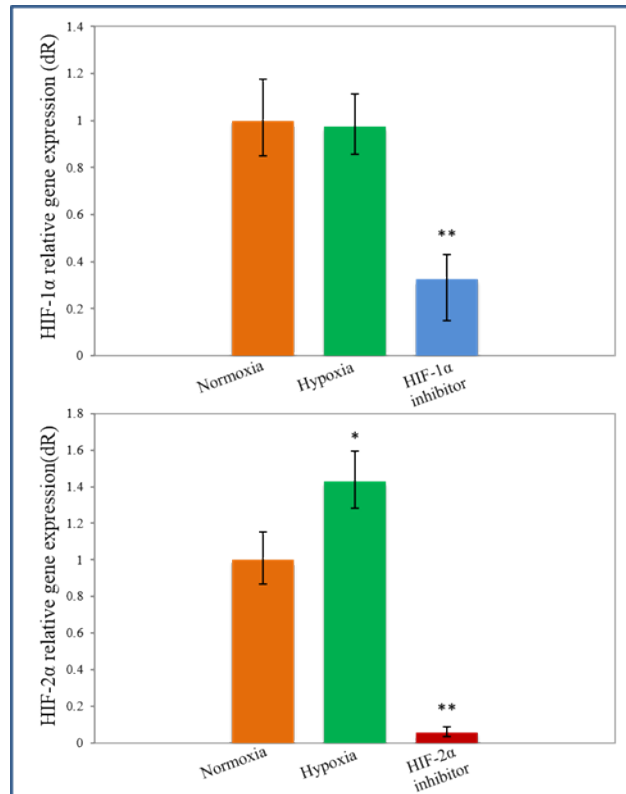

**Supplemental figure 4.** The effects of HIFs inhibitors on the mRNA gene expressions of HIF-1 $\alpha$  and HIF-2 $\alpha$  by quantitative RT-PCR assay. Chondrocyte spheroids were cultured for 3 days after treated with HIF-1 $\alpha$  and HIF-2 $\alpha$  inhibitors at the concentration of 30 $\mu$ M, respectively. Error bars were standard deviations, the data was shown as mean $\pm$ SD (n=3), Statistic significance was calculated by Student's unpaired t-test; \*\*, p<0.01 vs normoxic group \*, p<0.05 vs normoxic group.
